# Supplementary material
Source: Springer Nature journal article supplement (https://www.springermedizin.de/resource/supplementary/12885_2006_532_MOESM6_ESM.pdf/9469700)

A

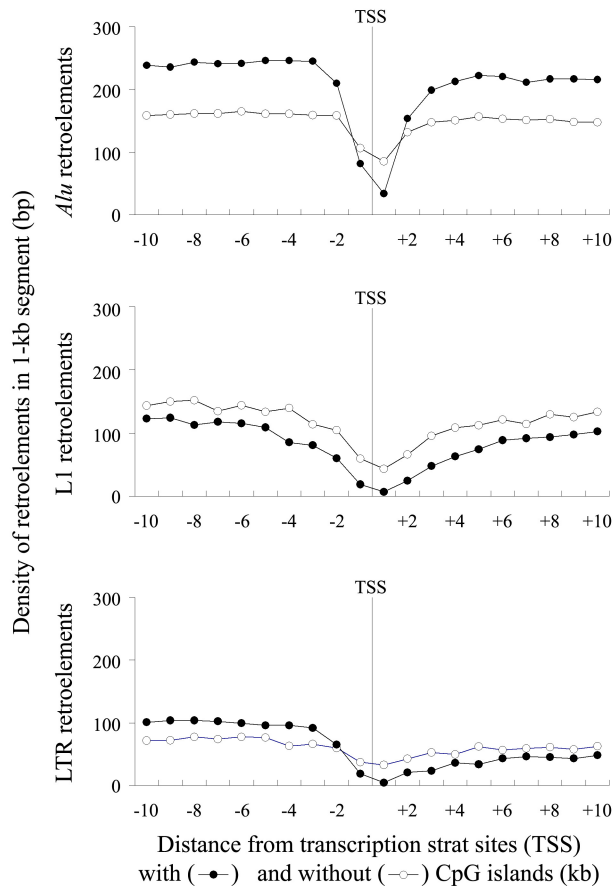

B

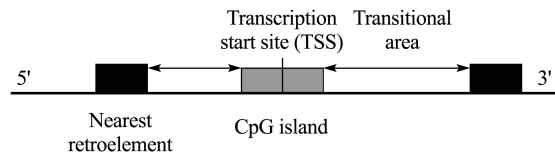

C

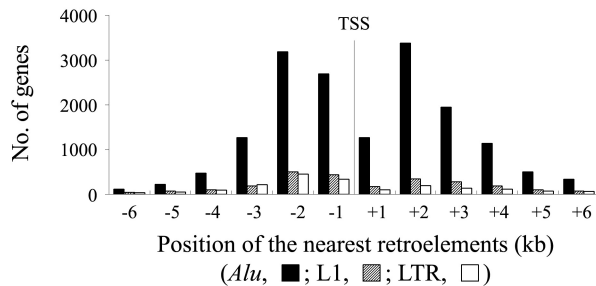

D

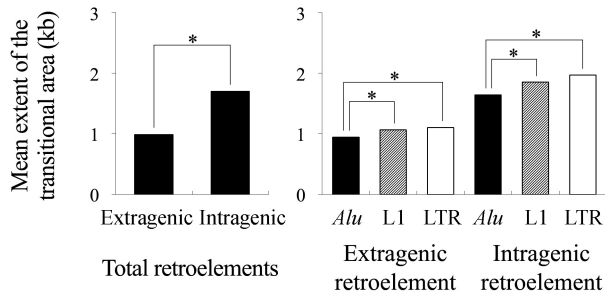

Supplement: MOESM6 [file 9469700]
